# Supplementary material for: Quantitative Analysis of Pyrazines and Their Perceptual Interactions in Soy Sauce Aroma Type Baijiu
Source: MDPI journal article supplement (doi:10.3390/foods10020441), 2021-02-17
Supplement: s1 [file s1]

## *Supplementary Material*

# **Quantitative Analysis of Pyrazines and Their Perceptual Interactions in Soy Sauce Aroma Type Baijiu**

**Yan Yan <sup>1,2</sup>, Shuang Chen <sup>1</sup>, Yao Nie <sup>1,\*</sup>, and Yan Xu <sup>1,\*</sup>**

<sup>1</sup>State Key Laboratory of Food Science & Technology, Key Laboratory of Industrial Biotechnology of Ministry of Education & School of Biotechnology, Jiangnan University, Wuxi 214100, China;

<sup>2</sup>School of Liquor and Food Engineering, Guizhou University, Guiyang 550025, China.

\*Correspondence: ynie@jiangnan.edu.cn (Y.N.); yxu@jiangnan.edu.cn (Y.X.).

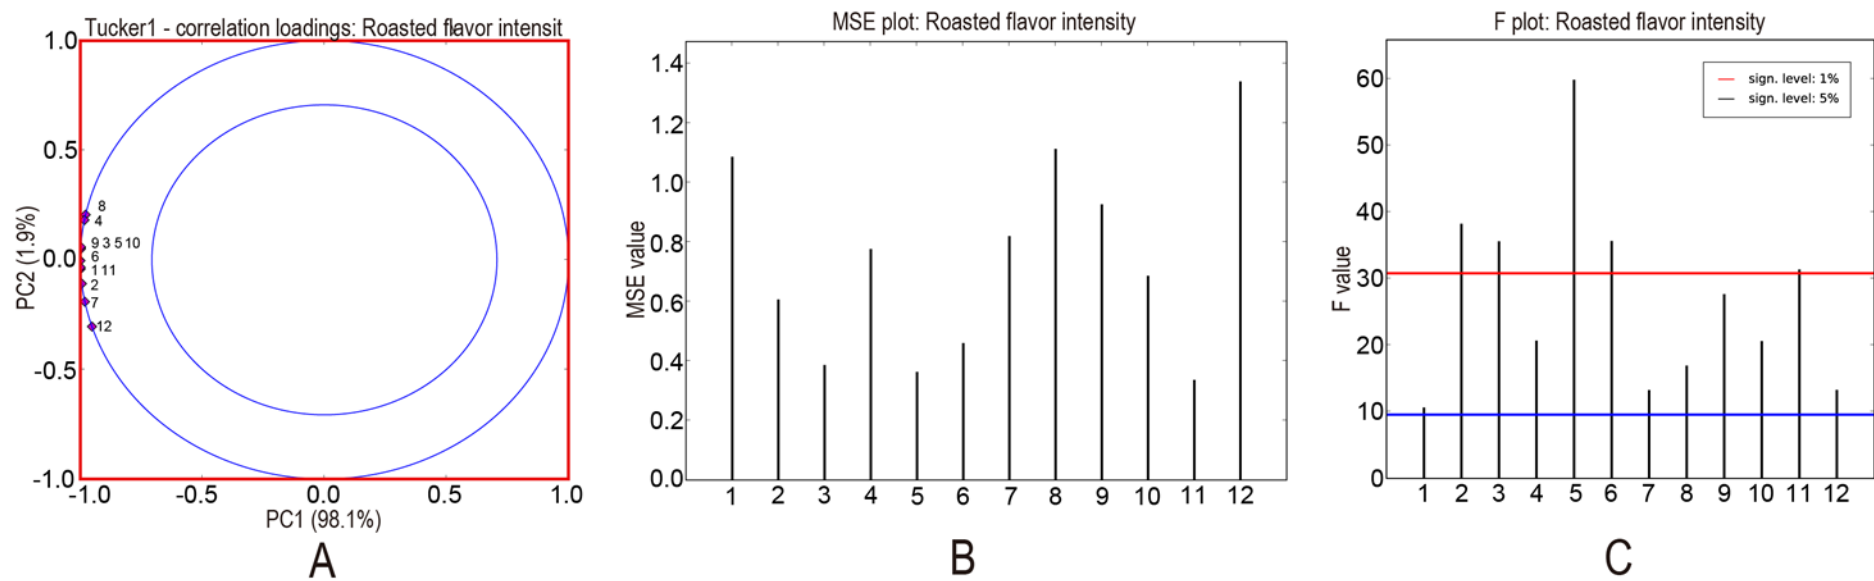

**Supplemental Figure S1:** Tucker-1 (A) plots visualizing the agreement. MSE plot (B) visualizing the repeatability. *F* plots (C) visualizing the panels' ability to discrimination between the Baijiu samples for roasted attribute.

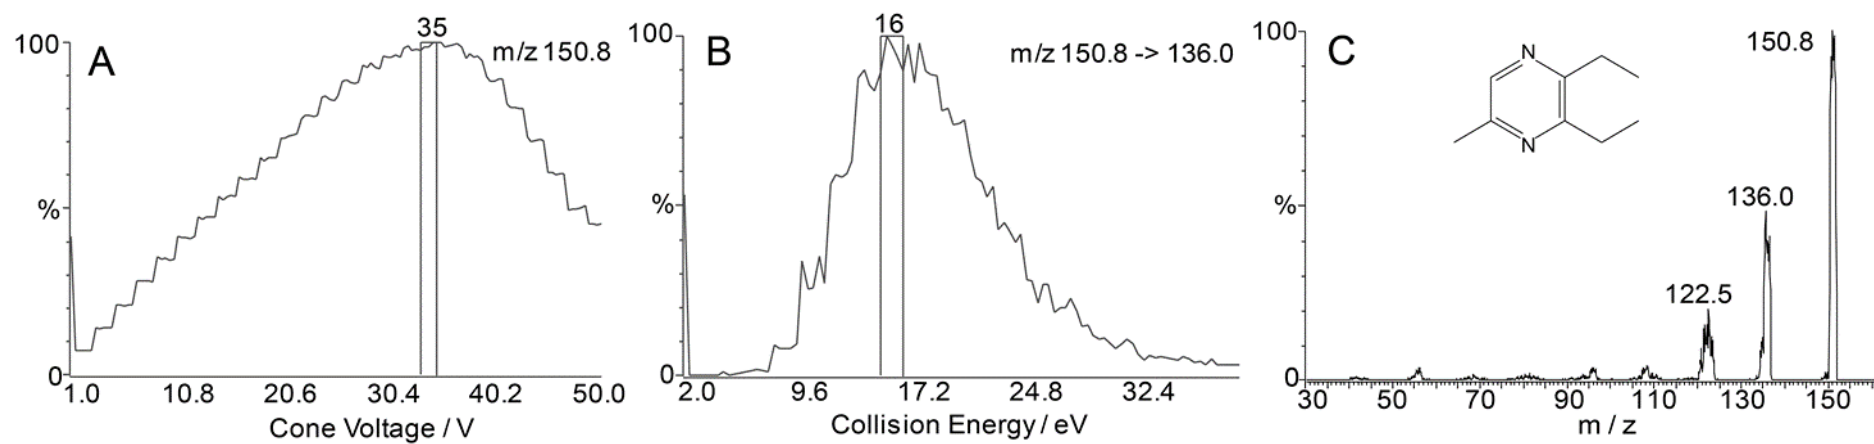

**Supplemental Figure S2:** MS/MS method optimization (A and B) and mass spectra (C) for 2,3-diethyl-5-methylpyrazine.

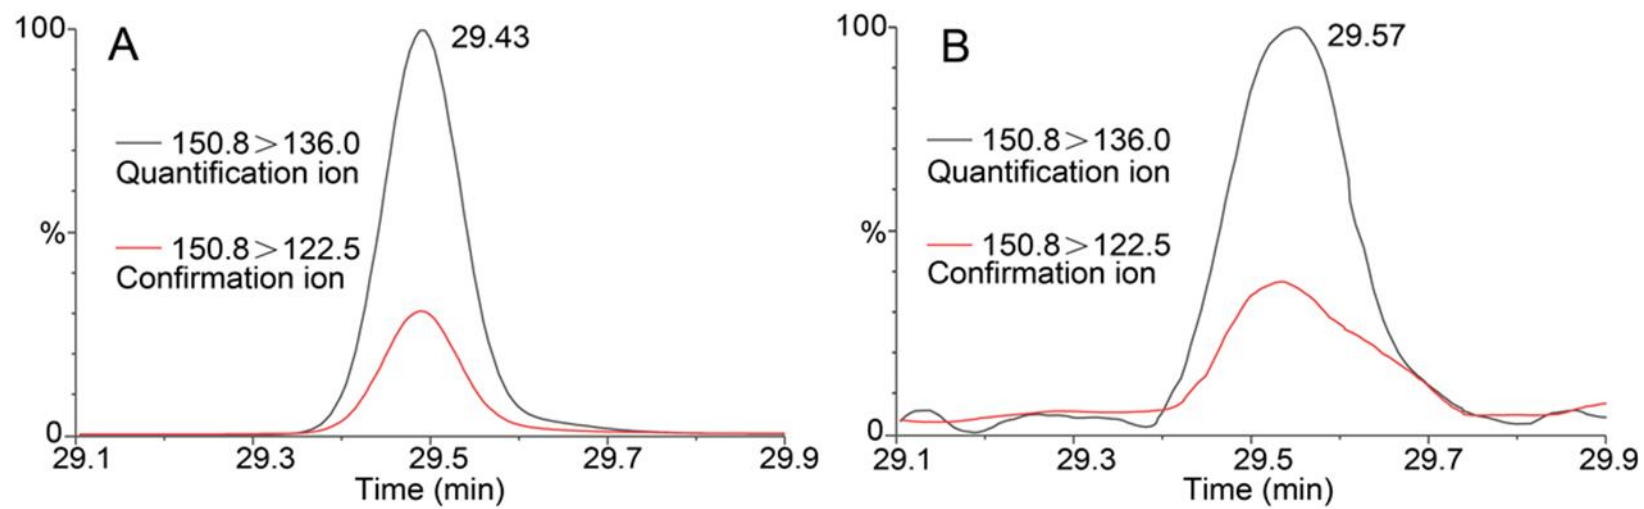

**Supplemental Figure S3:** MS/MS method optimization (A and B) and mass spectra (C) for 2,3-diethyl-5-methylpyrazine.

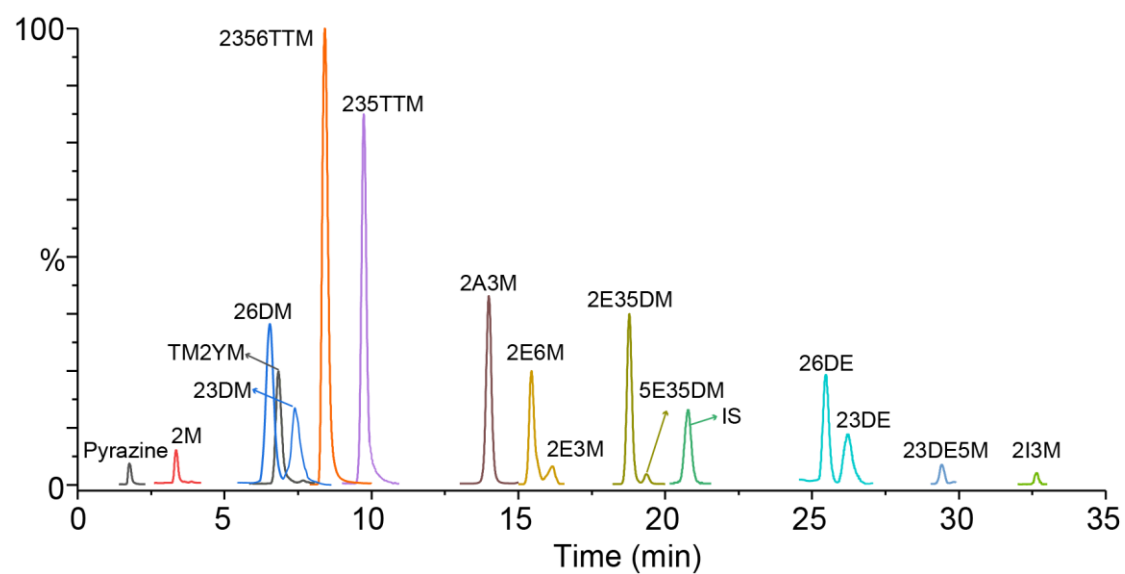

**Supplemental Figure S4:** Total ion chromatograms all pyrazine standards under the optimal instrumental conditions.

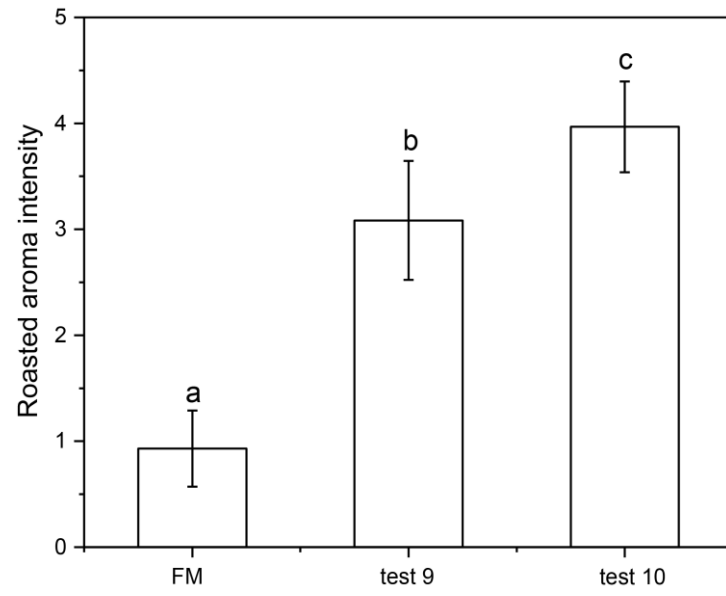

**Supplemental Figure S5:** Roasted aroma intensities of the FM.

**Table S1.** Information of soy sauce aroma type Baijiu samples in this study

| No. | Name                              | Abbreviation | Manufacturer                                            | Location            | Alcohol %<br>by Volume |
|-----|-----------------------------------|--------------|---------------------------------------------------------|---------------------|------------------------|
| 1   | GUO TAI GUO<br>BIAO               | GT           | GUI ZHOU GUOTAI LIQUOR CO.,<br>LTD.                     | Beijing,<br>China   | 53                     |
| 2   | MOUTAI PRINCE                     | WZJ          | KWEICHOW MOUNTAI CO., LTD.                              | Zunyi,<br>China     | 53                     |
| 3   | ZHAI YAO                          | ZY           | GUI ZHOU JINSHAJIAO LIQUOR<br>CO., LTD.                 | Zunyi,<br>China     | 53                     |
| 4   | QIN HAN ZHANG<br>JIU              | QHZ          | KWEICHOW MOUNTAI<br>QINHANZHANG JIUYE CO., LTD.         | Zunyi,<br>China     | 53                     |
| 5   | DIAOYUTAI<br>AMBASSADOR<br>LIQUOR | DYT          | KWEICHOW DIAOYUTAI STATE<br>GUEST DISTILLERY CO., LTD.  | Zunyi,<br>China     | 53                     |
| 6   | JIAO CANG                         | XJ           | GUIZHOU MAOTAI<br>OISTILLERY(GROUP) XI JIU CO.,<br>LTD. | Zunyi,<br>China     | 53                     |
| 7   | LANG PAI LANG<br>JIU              | LJ           | SICHUAN GULIN LANGJIU<br>DISTILLERY CO., LTD.           | Luzhou,<br>China    | 53                     |
| 8   | ZHEN WU                           | ZJ           | GUIZHOU ZHENJIU<br>LIQUOR-MAKING CO., LTD.              | Zunyi,<br>China     | 53                     |
| 9   | WU LING JIU                       | WL           | CHINA HUNAN WULING SPIRITS<br>CO., LTD.                 | Changde,<br>China   | 53                     |
| 10  | FU MAO                            | FM           | FU MAO WINE GROUP CO., LTD.                             | Fujian,<br>China    | 50                     |
| 11  | ZHEN ZHU YE                       | ZZY          | HU BEI ZHEN ZHU YE LIQUOR<br>CO., LTD.                  | Xiangyang,<br>China | 53                     |

**Table S2.** The complementary nominal scale for sensory analysis.

| <b>Intensity</b>                                                                     | <b>Rating range</b> |
|--------------------------------------------------------------------------------------|---------------------|
| The attribute is not perceived at all                                                | 0                   |
| Doubts about the presence of the attribute                                           | 0-1                 |
| The attribute is perceived but very slightly                                         | 1-2                 |
| The attribute is clearly perceived, although it is slight                            | 2-3                 |
| The attribute is clearly perceived, but the intensity is lower than the reference    | 3-4                 |
| The attribute is clearly perceived, and the intensity is very close to the reference | 4-5                 |
| The intensity of the attribute is similar to the reference                           | 5                   |
| The intensity of the attribute is slightly higher than the reference                 | 5-6                 |
| The intensity of the attribute is much higher than the reference                     | 6-7                 |



**Table S3.** Linear range,  $R^2$ , LOD, and LOQ of the established method for pyrazines.

| No. | Compounds       | Linear equation<br>( $\mu\text{g}\cdot\text{L}^{-1}$ ) | Linear range<br>( $\mu\text{g}\cdot\text{L}^{-1}$ ) | $R^2$  | LOD <sup>a</sup><br>( $\mu\text{g}\cdot\text{L}^{-1}$ ) | LOQ <sup>b</sup><br>( $\mu\text{g}\cdot\text{L}^{-1}$ ) | RSD <sup>c</sup> (%) | Recovery (%) |
|-----|-----------------|--------------------------------------------------------|-----------------------------------------------------|--------|---------------------------------------------------------|---------------------------------------------------------|----------------------|--------------|
| 1   | Pyrazine        | $y = 0.0093x + 8.561$                                  | 7-896                                               | 0.9991 | 1.92                                                    | 6.35                                                    | 4.33                 | 89.01        |
| 2   | 2M <sup>a</sup> | $y = 0.0019x - 1.249$                                  | 10-1280                                             | 0.9975 | 1.86                                                    | 6.15                                                    | 2.90                 | 94.77        |
| 3   | 26DM            | $y = 0.0275x + 18.568$                                 | 5-5120                                              | 0.9970 | 1.24                                                    | 4.09                                                    | 3.96                 | 84.36        |
| 4   | TM2YM           | $y = 0.0011x + 0.0032$                                 | 5-1280                                              | 0.9985 | 0.53                                                    | 1.77                                                    | 2.10                 | 87.20        |
| 5   | 23DM            | $y = 0.0685x - 22.106$                                 | 10-1280                                             | 0.9995 | 1.03                                                    | 3.41                                                    | 6.36                 | 89.62        |
| 6   | 2356TTM         | $y = 0.0014x - 64.603$                                 | 5-5120                                              | 0.9918 | 0.63                                                    | 2.08                                                    | 3.01                 | 97.29        |
| 7   | 235TM           | $y = 0.0024x + 34.802$                                 | 13-6656                                             | 0.9982 | 0.91                                                    | 3.01                                                    | 1.22                 | 92.08        |
| 8   | 2A3M            | $y = 0.0189x + 55.21$                                  | 6-768                                               | 0.9969 | 1.43                                                    | 5.06                                                    | 3.59                 | 85.61        |
| 9   | 2E6M            | $y = 0.0029x + 28.814$                                 | 2-4096                                              | 0.9996 | 0.76                                                    | 2.53                                                    | 1.86                 | 95.07        |
| 10  | 2E3M            | $y = 0.0068x + 7.034$                                  | 2-512                                               | 0.9979 | 0.41                                                    | 1.35                                                    | 4.16                 | 86.10        |
| 11  | 2E35DM          | $y = 0.0004x + 0.0066$                                 | 2-4096                                              | 0.9997 | 0.56                                                    | 1.84                                                    | 1.02                 | 86.22        |
| 12  | 5E35DM          | $y = 0.0059x + 0.0043$                                 | 2-512                                               | 0.9975 | 0.33                                                    | 1.10                                                    | 5.10                 | 87.42        |
| 13  | 26DE            | $y = 0.018x - 24.705$                                  | 2-512                                               | 0.9992 | 0.28                                                    | 0.95                                                    | 1.76                 | 95.07        |
| 14  | 23DE            | $y = 0.0275x - 49.33$                                  | 5-1280                                              | 0.9986 | 0.45                                                    | 1.50                                                    | 1.09                 | 84.59        |
| 15  | 23DE5M          | $y = 0.0023x + 0.0124$                                 | 0.7-89.6                                            | 0.9986 | 0.15                                                    | 0.51                                                    | 6.17                 | 95.19        |
| 16  | 2I3M            | $y = 0.0011x + 0.0032$                                 | 0.7-89.6                                            | 0.9991 | 0.17                                                    | 0.58                                                    | 2.38                 | 103.92       |

<sup>a</sup>LOD, limit of detection; <sup>b</sup>LOQ, LOQ, limit of quantitation; <sup>c</sup>RSD, relative standard deviation.

**Table S4.** Determination of the detection probability ( $p$ ) of mixture of four sub-threshold pyrazines (A) and supra-threshold pyrazines (B): measured aroma threshold and calculated aroma threshold obtained by Feller's additive model.

| before mixture          |                                                               | after mixture                                |                                                                                    |
|-------------------------|---------------------------------------------------------------|----------------------------------------------|------------------------------------------------------------------------------------|
| $p(A)$<br>alone         | $p(B)$<br>alone                                               | $p(B \text{ in "A" sample})$<br>experimental | $p(B \text{ in "A" sample})$<br>calculated according to<br>Feller's additive model |
| calculated and<br>fixed | $= ((3 \times \text{proportion of correct responses}) - 1)/2$ |                                              | $= p(A) + p(B) - p(A) p(B)$                                                        |
| 0.175                   | 0.025                                                         | 0.25                                         | 0.196                                                                              |
| 0.175                   | 0.025                                                         | 0.475                                        | 0.196                                                                              |
| 0.175                   | 0.1                                                           | 0.4                                          | 0.258                                                                              |
| 0.175                   | 0.475                                                         | 0.625                                        | 0.567                                                                              |
| 0.175                   | 0.625                                                         | 0.85                                         | 0.691                                                                              |
| 0.175                   | 0.775                                                         | 0.775                                        | 0.814                                                                              |
| 0.175                   | 0.775                                                         | 1                                            | 0.814                                                                              |
| 0.175                   | 1                                                             | 1                                            | 1                                                                                  |
| 0.175                   | 1                                                             | 1                                            | 1                                                                                  |

A, four sub-threshold pyrazines (2,3-dimethylpyrazine, 2,3-diethylpyrazine, 2,3-diethyl-5-methylpyrazine, and 2-acetyl-3-methylpyrazine); B, four supra-threshold pyrazines (2,6-dimethylpyrazine, 2-ethyl-6-methylpyrazine, 2,3,5-trimethylpyrazine, and 2-ethyl-3,5-dimethylpyrazine).
